# Supplementary material
Source: PubMed Central journal article supplement (PMC6240503)
Supplement: NIHMS968390-supplement-Supp_info.pdf [file NIHMS968390-supplement-Supp_info.pdf]

**Supplementary Table 1.** Inclusion and exclusion International Classification of Diseases-9 Codes (ICD-9) codes used in the algorithm of NAFLD cases identification.

|                                                                                                                                                                                                                                                                                                                                                                                                                                                                                                                                                                                                                                                                                                                                                                                                                                                                                                                                                                                                                                                                                                                                                                                                                                                                                                                                                                                                                                                                                                                                                                                                                                                                                                                                                                                                                                                                                                                                                                                                                                                                                                                                              |
|----------------------------------------------------------------------------------------------------------------------------------------------------------------------------------------------------------------------------------------------------------------------------------------------------------------------------------------------------------------------------------------------------------------------------------------------------------------------------------------------------------------------------------------------------------------------------------------------------------------------------------------------------------------------------------------------------------------------------------------------------------------------------------------------------------------------------------------------------------------------------------------------------------------------------------------------------------------------------------------------------------------------------------------------------------------------------------------------------------------------------------------------------------------------------------------------------------------------------------------------------------------------------------------------------------------------------------------------------------------------------------------------------------------------------------------------------------------------------------------------------------------------------------------------------------------------------------------------------------------------------------------------------------------------------------------------------------------------------------------------------------------------------------------------------------------------------------------------------------------------------------------------------------------------------------------------------------------------------------------------------------------------------------------------------------------------------------------------------------------------------------------------|
| <b>INCLUSION</b>                                                                                                                                                                                                                                                                                                                                                                                                                                                                                                                                                                                                                                                                                                                                                                                                                                                                                                                                                                                                                                                                                                                                                                                                                                                                                                                                                                                                                                                                                                                                                                                                                                                                                                                                                                                                                                                                                                                                                                                                                                                                                                                             |
| 571.8 other chronic nonalcoholic liver disease<br>571.9 unspecified chronic liver disease without alcohol<br>571.5 cirrhosis without alcohol                                                                                                                                                                                                                                                                                                                                                                                                                                                                                                                                                                                                                                                                                                                                                                                                                                                                                                                                                                                                                                                                                                                                                                                                                                                                                                                                                                                                                                                                                                                                                                                                                                                                                                                                                                                                                                                                                                                                                                                                 |
| <b>EXCLUSION</b>                                                                                                                                                                                                                                                                                                                                                                                                                                                                                                                                                                                                                                                                                                                                                                                                                                                                                                                                                                                                                                                                                                                                                                                                                                                                                                                                                                                                                                                                                                                                                                                                                                                                                                                                                                                                                                                                                                                                                                                                                                                                                                                             |
| <b>HEPATITIS (VIRAL AND AUTOIMMUNE)</b>                                                                                                                                                                                                                                                                                                                                                                                                                                                                                                                                                                                                                                                                                                                                                                                                                                                                                                                                                                                                                                                                                                                                                                                                                                                                                                                                                                                                                                                                                                                                                                                                                                                                                                                                                                                                                                                                                                                                                                                                                                                                                                      |
| 070.0 viral hepatitis A with hepatic coma<br>070.1 viral hepatitis A without hepatic coma<br>070.20 viral hepatitis B with hepatic coma acute or unspecified without hepatitis delta<br>070.21 viral hepatitis B with hepatic coma acute or unspecified with hepatitis delta<br>070.22 chronic viral hepatitis B with hepatic coma without hepatitis delta<br>070.23 chronic viral hepatitis B with hepatic coma with hepatitis delta<br>070.30 viral hepatitis B without hepatic coma acute or unspecified without hepatitis delta<br>070.31 viral hepatitis B with hepatic coma acute or unspecified with hepatitis delta<br>070.32 chronic viral hepatitis B without hepatic coma without hepatitis delta<br>070.33 chronic viral hepatitis B without hepatic coma with hepatitis delta<br>070.41 acute hepatitis C with hepatic coma<br>070.42 hepatitis delta without active hepatitis B with hepatic coma<br>070.43 hepatitis E with hepatic coma<br>070.44 chronic hepatitis C with hepatic coma<br>070.49 other specified viral hepatitis with hepatic coma<br>070.51 acute hepatitis C without mention of hepatic coma<br>070.52 hepatitis delta without active hepatitis B disease or hepatic coma<br>070.53 hepatitis E without hepatic coma<br>070.54 chronic hepatitis C without hepatic coma<br>070.59 other specified viral hepatitis without hepatic coma<br>070.6 unspecified viral hepatitis with hepatic coma<br>070.70 unspecified viral hepatitis C without hepatic coma<br>070.71 unspecified viral hepatitis C with hepatic coma<br>070.9 unspecified viral hepatitis without hepatic coma<br>V02.60 carrier or suspected carrier of viral hepatitis unspecified<br>V02.61 carrier or suspected carrier of hepatitis B<br>V02.62 carrier or suspected carrier of hepatitis C<br>V02.69 carrier or suspected carrier of other viral hepatitis<br>571.40 chronic hepatitis unspecified<br>571.41 chronic persistent hepatitis<br>571.42 autoimmune hepatitis<br>571.49 chronic hepatitis<br>573.1 hepatitis in viral diseases classified elsewhere<br>573.2 hepatitis in other infectious diseases classified elsewhere |
| <b>ALCOHOLIC LIVER DISEASE</b>                                                                                                                                                                                                                                                                                                                                                                                                                                                                                                                                                                                                                                                                                                                                                                                                                                                                                                                                                                                                                                                                                                                                                                                                                                                                                                                                                                                                                                                                                                                                                                                                                                                                                                                                                                                                                                                                                                                                                                                                                                                                                                               |
| 571.0 alcoholic fatty liver disease<br>571.1 acute alcoholic hepatitis<br>571.2 alcoholic cirrhosis of liver<br>571.3 alcoholic liver damage                                                                                                                                                                                                                                                                                                                                                                                                                                                                                                                                                                                                                                                                                                                                                                                                                                                                                                                                                                                                                                                                                                                                                                                                                                                                                                                                                                                                                                                                                                                                                                                                                                                                                                                                                                                                                                                                                                                                                                                                 |
| <b>OTHER</b>                                                                                                                                                                                                                                                                                                                                                                                                                                                                                                                                                                                                                                                                                                                                                                                                                                                                                                                                                                                                                                                                                                                                                                                                                                                                                                                                                                                                                                                                                                                                                                                                                                                                                                                                                                                                                                                                                                                                                                                                                                                                                                                                 |
| 571.6 biliary cirrhosis                                                                                                                                                                                                                                                                                                                                                                                                                                                                                                                                                                                                                                                                                                                                                                                                                                                                                                                                                                                                                                                                                                                                                                                                                                                                                                                                                                                                                                                                                                                                                                                                                                                                                                                                                                                                                                                                                                                                                                                                                                                                                                                      |

**Supplementary Table 2.** International Classification of Diseases-9 (ICD-9) used in the definition of metabolic comorbidities.

|                                                 |
|-------------------------------------------------|
| <b>DIABETES MELLITUS</b>                        |
| ICD-9: 250.xx                                   |
| <b>HYPERTENSION</b>                             |
| 401.0-9 Essential hypertension                  |
| 402.0-91 Hypertensive heart disease             |
| 403.00-91 Hypertensive chronic kidney disease   |
| 404.00-93 Hypertensive heart and kidney disease |
| <b>DYSLIPIDEMIA</b>                             |
| 272.0-9 Disorders of lipid metabolism           |

**Supplementary Table 3.** Current Procedural Terminology, Version 4 (CPT-4) procedure codes and Healthcare Common Procedure Coding System (HCPCS) procedure codes used for utilization definition.

| <b>Imaging</b>                   | <b>CPT/HCPCS Code</b>                                  |
|----------------------------------|--------------------------------------------------------|
| Abdominal ultrasound             | 76700, 76705                                           |
| Computed tomography              | 74150, 74160, 74170, 74174, 74175, 74176, 74177, 74178 |
| Magnetic resonance imaging       | 74181, 74182, 74183, 74185                             |
| Fibroscan                        | 91200                                                  |
| Elastography                     | 0346T                                                  |
| <b>Liver biopsy</b>              | 47000, 47001                                           |
| <b>Laboratory tests</b>          |                                                        |
| Basic metabolic panel            | 80047, 80048, G0096                                    |
| General health panel             | 80050                                                  |
| Electrolyte panel                | 80051                                                  |
| Comprehensive metabolic panel    | 80053, G0098                                           |
| Hepatic function panel           | 80058, 80076                                           |
| Hepatitis panel                  | 80059                                                  |
| Lipid panel                      | 80061                                                  |
| Renal function panel             | 80069                                                  |
| Acute hepatitis panel            | 80074                                                  |
| Albumin                          | 82040                                                  |
| Apolipoprotein                   | 82172                                                  |
| Bilirubin total                  | 82247                                                  |
| Bilirubin direct                 | 82248                                                  |
| Assay bilirubin                  | 82250                                                  |
| Cholesterol total                | 82465                                                  |
| Creatinine                       | 82565                                                  |
| Creatinine clearance test        | 82575                                                  |
| Glucose blood test               | 82947, 82950, 82962                                    |
| Glucose tolerance test           | 82977                                                  |
| Glycosylated hemoglobin test     | 83036, 83037                                           |
| HDL/LDL                          | 83718                                                  |
| Assay alkaline phosphate         | 84075, 84078, 84080                                    |
| Aspartate aminotransferase (AST) | 84450                                                  |
| Alanine aminotransferase (ALT)   | 84460                                                  |
| Assay triglycerides              | 84478                                                  |
| Bleeding time test               | 85002                                                  |
| Hemocrit                         | 85013, 85014                                           |

|                             |                                   |
|-----------------------------|-----------------------------------|
| Hemoglobin                  | 85018                             |
| Automated hemogram          | 85021, 85023, 85024, 85025, 85027 |
| Manual platelet count       | 85032                             |
| Automated leukocyte count   | 85048                             |
| Automated platelet count    | 85049                             |
| Coagulation time            | 85345, 85347, 85348               |
| Prothrombin test            | 85610, 85611                      |
| Partial thromboplastin time | 85730, 85732                      |

**Supplementary Table 4.** Current Procedural Terminology, Version 4 (CPT-4) codes and American Medical Association (AMA) codes used for the definition of healthcare utilization.

|                  |                                                                             |
|------------------|-----------------------------------------------------------------------------|
| Office Visits*   | AMA code=11 (office) and CPT codes: 99201-99205, 99211-99215, 99241-99245   |
| Hospitalizations | AMA code=21 and revenue codes: 010x - 016x, 020x-021x                       |
| ER Visits¶       | CPT codes: 99281-99285, 99288 or revenue codes: 0450-0452, 0456, 0459, 0981 |

\*Counted one per specialty per day if more than one on a service date

¶ If ER visit resulted in hospital admission then it was counted as hospitalization and not ER visit

**Supplementary Table 5.** Changes in annual utilization rates (per 1000 subjects) after NAFLD diagnosis.

|                                | Controls                 |                       |                     | NAFLD                     |                        |                     |
|--------------------------------|--------------------------|-----------------------|---------------------|---------------------------|------------------------|---------------------|
|                                | 1 year prior to matching | 1 year after matching | Rate Ratio (95% CI) | 1 year prior to diagnosis | 1 year after diagnosis | Rate Ratio (95% CI) |
| <b>A. Commercial insurance</b> | <b>N=76,632</b>          |                       |                     | <b>N=76,632</b>           |                        |                     |
| Liver biopsy                   | 0.1                      | 0.2                   | 2.00 (0.90, 4.45)   | 5.5                       | 28.8                   | 5.24 (4.73, 5.82)   |
| Imaging                        | 110.9                    | 123.6                 | 1.11 (1.07, 1.16)   | 482.3                     | 1215.5                 | 2.52 (2.49, 2.56)   |
| Ultrasound                     | 26.8                     | 29.2                  | 1.09 (1.03, 1.16)   | 177.2                     | 490.1                  | 2.77 (2.71, 2.82)   |
| Computer tomography            | 58.3                     | 66.8                  | 1.15 (1.09, 1.20)   | 215.0                     | 552.1                  | 2.57 (2.52, 2.62)   |
| Magnetic resonance imaging     | 3.2                      | 3.8                   | 1.18 (0.97, 1.44)   | 18.0                      | 61.6                   | 3.42 (3.20, 3.66)   |
| Laboratory tests               | 1488.4                   | 1758.9                | 1.18 (1.17, 1.20)   | 2551.7                    | 3324.5                 | 1.30 (1.29, 1.32)   |
| Hospitalizations               | 63.3                     | 68.5                  | 1.08 (1.03, 1.13)   | 125.5                     | 212.2                  | 1.69 (1.64, 1.75)   |
| Office visits                  | 4301.9                   | 4571.8                | 1.06 (1.05, 1.07)   | 6546.7                    | 7480.5                 | 1.14 (1.13, 1.15)   |
| Emergency room visits          | 111.2                    | 96.2                  | 0.87 (0.84, 0.89)   | 174.7                     | 175.5                  | 1.00 (0.98, 1.03)   |
| <b>B. Medicare Advantage</b>   | <b>N=31,721</b>          |                       |                     | <b>N=31,721</b>           |                        |                     |
| Liver biopsy                   | 0.4                      | 0.6                   | 1.67 (0.81, 3.41)   | 4.6                       | 19.6                   | 4.22 (3.53, 5.06)   |
| Imaging                        | 240.6                    | 270.6                 | 1.12 (1.07, 1.18)   | 636.3                     | 1470.4                 | 2.31 (2.27, 2.36)   |
| Ultrasound                     | 45.7                     | 48.7                  | 1.06 (0.99, 1.15)   | 188.4                     | 499.9                  | 2.65 (2.58, 2.73)   |
| Computer tomography            | 130.4                    | 148.1                 | 1.14 (1.08, 1.20)   | 309.3                     | 720.0                  | 2.33 (2.27, 2.39)   |
| Magnetic resonance imaging     | 7.1                      | 8.4                   | 1.19 (0.98, 1.44)   | 24.3                      | 71.3                   | 2.93 (2.68, 3.20)   |
| Laboratory tests               | 2952.0                   | 3070.6                | 1.04 (1.02, 1.06)   | 3608.1                    | 4063.0                 | 1.13 (1.11, 1.15)   |
| Hospitalizations               | 233.8                    | 266.4                 | 1.14 (1.09, 1.19)   | 343.9                     | 492.6                  | 1.43 (1.39, 1.48)   |
| Office visits                  | 7611.1                   | 7658.6                | 1.01 (0.99, 1.02)   | 9792.9                    | 10619.9                | 1.08 (1.07, 1.10)   |
| Emergency room visits          | 361.1                    | 396.2                 | 1.10 (1.06, 1.14)   | 555.0                     | 668.2                  | 1.20 (1.17, 1.24)   |
